# Supplementary material for: Efficiently cogenerating drinkable water and electricity from seawater via flexible MOF nanorod arrays
Source: Royal Society of Chemistry journal article supplement (doi:10.1039/d0ta11870b), 2021-01-01
Supplement: d0ta11870b1.pdf [file d0ta11870b1.pdf]

## Supporting Information

### **Efficiently Cogenerating Drinkable Water and Electricity from Seawater *via* Flexible MOFs Nanorod Arrays**

*Xu Ma, Zhuoyi Li, Deng Zheng, Danke Chen, Xiaobin Wang, Xinyi Wan, Zhou Fang, Xinsheng Peng\**

#### **The file includes:**

**Video S1.** The red LED is lighted up by device array under dark condition.

**Video S2.** The yellow LED is lighted up by device array under dark condition.

**Video S3.** The calculator is driven by device array under natural sunlight.

**Video S4.** The timer is driven by device array under natural sunlight.

**Calculation of solar-vapor efficiency.**

**Detailed analysis of energy.**

**Additional Figures and Tables.**

### Calculation of solar-vapor efficiency.

The solar-vapor efficiency ( $\eta$ , %) of the PCG 2D SDIWE device is calculated using the following formula (2):

$$\eta = (\dot{m}h_{LV})/I \quad (2)$$

where  $\dot{m}$  is the mass flux of water evaporation,  $h_{LV}$  is the vaporization enthalpy, and  $I$  is the power density of 1 sun irradiation ( $1 \text{ kW m}^{-2}$ ). In PCG 2D SDIWE device,  $\dot{m}$  is the average water evaporation rate under 1 sun is  $1.51 \text{ kg m}^{-2} \text{ h}^{-1}$  based on Figure 3c, and  $h_{LV}$  is estimated to be about  $1912 \text{ J g}^{-1}$  based on the DSC measurement in the Figure S6. Therefore, the solar-vapor efficiency of the PCG 2D SDIWE device is 80.2%.

### Detailed analysis of energy.

The consumption of input solar energy mainly includes: (i) solar reflection (3.5%), (ii) water evaporation (80.2%) and (iii) heat loss. The heat loss is mainly caused by radiation, convection and conduction.

#### (1) Radiation

The radiation heat loss of PCG 2D SDIWE device can be calculated by Stefan-Boltzmann Equation.

$$\varphi_{radd} = \varepsilon A \sigma (T_1^4 - T_2^4) \quad (S1)$$

where  $\varphi_{radd}$  is heat radiation flux,  $\varepsilon$  is the emissivity of the PCG membrane, which is 0.965 in this work,  $A$  is the surface area of PCG membrane,  $\sigma$  is Stefan-Boltzmann constant ( $5.67 \times 10^{-8} \text{ W m}^{-2} \text{ K}^{-4}$ ),  $T_1$  is the surface temperature of PCG membrane during evaporation ( $38.1 \text{ }^\circ\text{C}$ ) and  $T_2$  is the ambient temperature ( $25.0 \text{ }^\circ\text{C}$ ). Therefore, the heat radiation loss is  $\sim 8.1\%$  under 1 sun irradiation.

#### (2) Convection

The convection heat loss of PCG 2D SDIWE device can be calculated by Newton's law of cooling.

$$\varphi_{conv} = hA(T_1 - T_2) \quad (S2)$$

where  $\varphi_{conv}$  is heat convection flux,  $h$  is the convection heat transfer coefficient ( $5 \text{ W m}^{-2} \text{ K}^{-1}$ ).  $T_1$  is the surface temperature of PCG membrane during evaporation ( $38.1 \text{ }^\circ\text{C}$ ) and  $T_2$  is the ambient temperature ( $25.0 \text{ }^\circ\text{C}$ ). Therefore, the convection heat loss is  $\sim 6.5\%$  under 1 sun irradiation.

### (3) Conduction

The conduction heat loss of PCG 2D SDIWE device can be calculated according to the following formula:

$$Q = Cm\Delta T \quad (S3)$$

where  $Q$  is conduction heat loss from PCG membrane to bulk water,  $C$  is specific heat of water ( $4.18 \text{ J g}^{-1} \text{ K}^{-1}$ ),  $m$  is the weight of bulk water and  $\Delta T$  is the elevated temperature of bulk water during evaporation. Due to water is transported from the bulk water to the membrane through the commercially available tissue, and the PCG membrane is placed on an insulating foam (the schematic illustration shown in Figure 3a, the PCG membrane and the foam are separated from the bulk water). The heat conduction from the PCG membrane to the bulk water is negligible, and there was no change in the temperature of bulk water ( $\Delta T \approx 0$ ). Therefore, the conduction heat loss is  $\sim 0\%$  under 1 sun irradiation.

Based on equation S1, S2 and S3, the heat loss of this PCG 2D SDIWE device is  $\sim 14.6\%$ .

## Additional Figures and Tables.

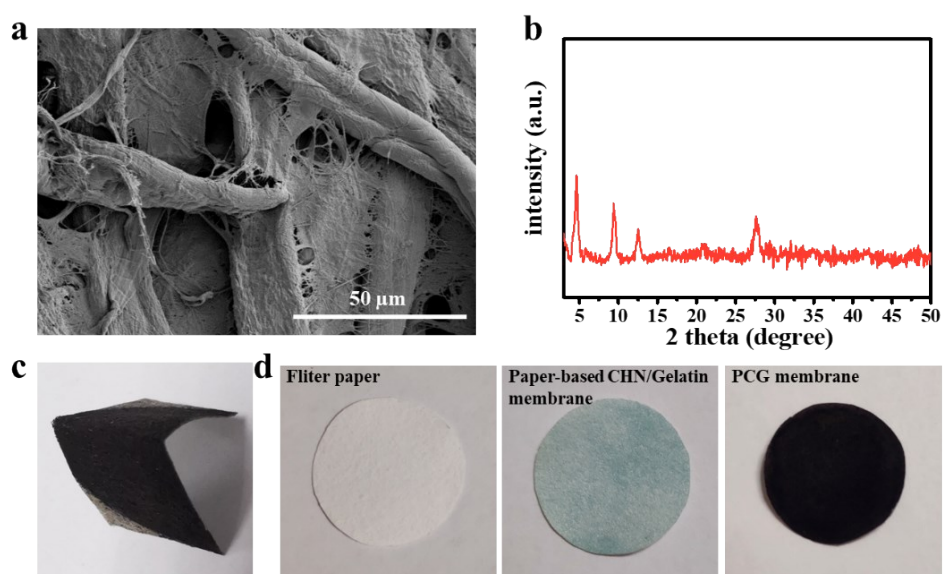

**Figure S1** (a) SEM image of slow speed quantitative filter paper; (b) XRD pattern of Cu-CAT-1 MOF nanorod arrays; Photo images of (c) the folded PCG membrane; (d) filter paper, paper-based CHN/Gelatin membrane and PCG membrane, respectively.

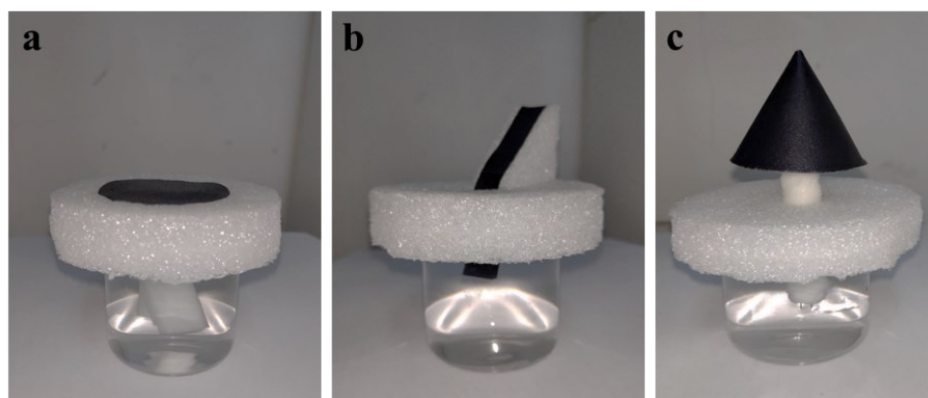

**Figure S2.** Digital images of the self-made water evaporation test device: (a) 2D SDIWE device; (b) 3D SDIWE device with 45° slope; (c) umbrella shaped 3D SDIWE device.

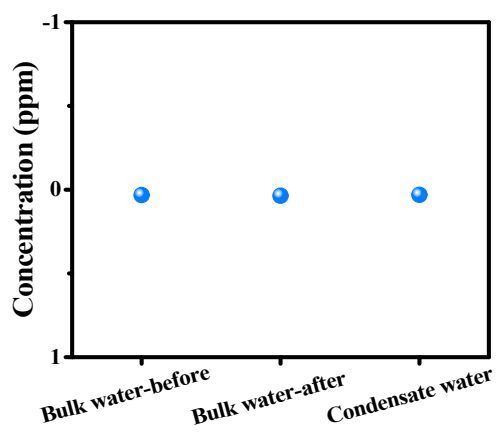

**Figure S3.** The concentrations of Cu<sup>2+</sup> in condensate water and bulk water before and after the long-term evaporation experiment (12 hours).

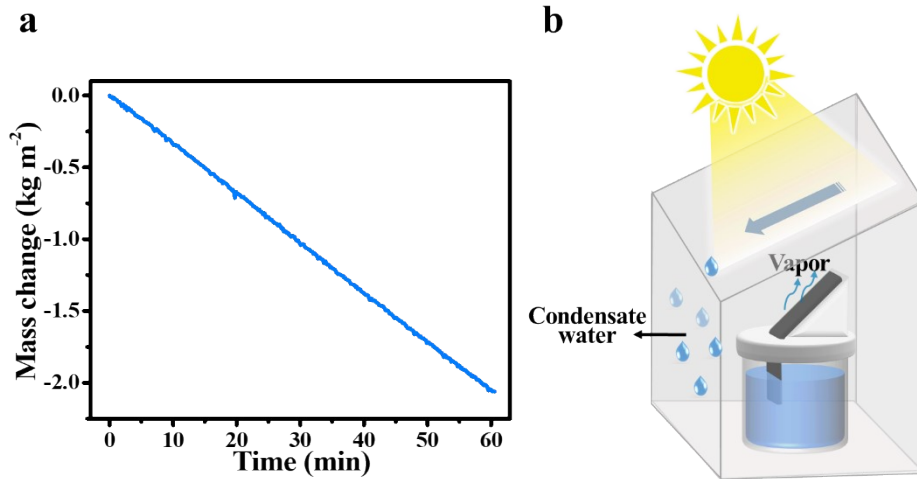

**Figure S4.** (a) Time-dependent mass change curve of 3D PCG SDIWE device with a slope of 45° using simulated seawater; (b) Schematic diagram of self-made water condensation device.

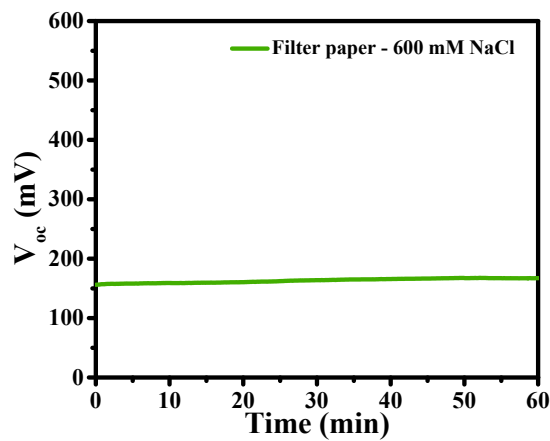

**Figure S5.** Time-dependent  $V_{oc}$  curve of filter paper in dark condition.

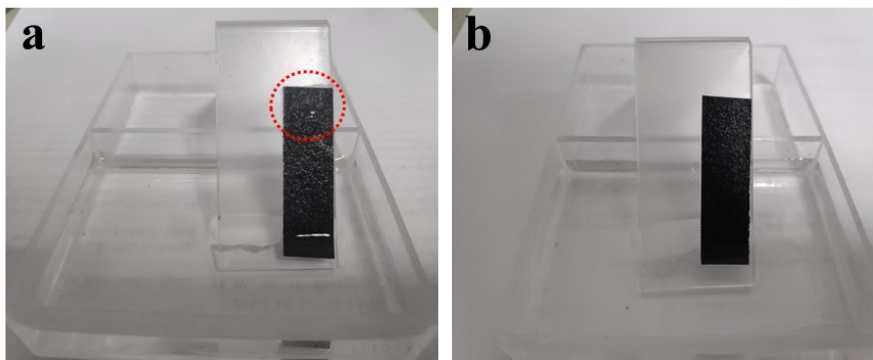

**Figure S6.** Digital images of (a) a small amount of salt precipitated on the surface of the ZSG membrane after 12 hours of solar irradiation; (b) the salt particles disappeared after 12 hours of standing at night.

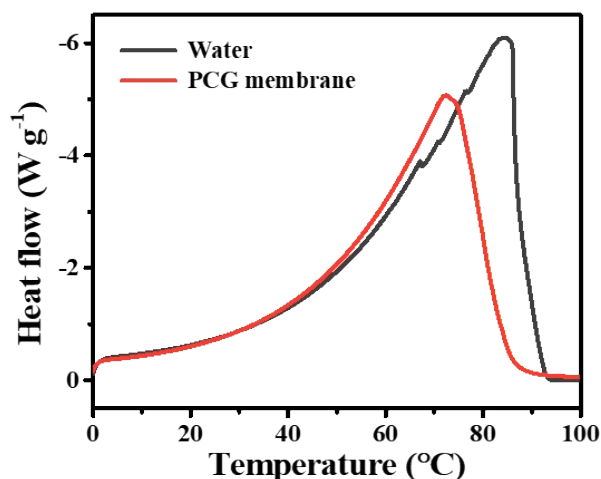

**Figure S7.** The change of heat flow signal as a function of temperature.

Note: To obtain an accurate vaporization enthalpy of water in PCG membrane, the DSC measurement was conducted. During the vaporization enthalpy measurements, all of the samples were placed in an open Al crucible and heated with a linear heating rate of 5 °C/min, under nitrogen flow flux (20 mL/min). Figure S6 shows the change of heat flow signal as a function of temperature. The measured enthalpy of water is 2283 J/g, which is very close to the theoretical value of 2257 J/g, indicating the accuracy of our measurements. Thus, the vaporization enthalpy of the water in PCG is 1912 J/g, which is smaller than that of pure water.

**Table S1.** Time-dependent temperature change of materials in dry state.

| Materials                                                   | Time (s) | Temperature (°C) | Reference |
|-------------------------------------------------------------|----------|------------------|-----------|
| Hierarchically nanostructured gel                           | 50       | ~ 32             | S1        |
| Narrow-bandgap Ti <sub>2</sub> O <sub>3</sub> nanoparticles | 700      | ~52              | S2        |
| Multi-walled carbon nanotubes                               | 10       | 45.5             | S3        |
| Dual-phase MoN/Mo <sub>2</sub> N nanorambutans              | 10       | 83               | S4        |
| PCG membrane                                                | 10       | 52.6             | This work |

**Table S2.** The comparison of performance between PCG membrane and the references about solar desalination and evaporation induced electricity generation.

| Materials                            | Solar vapor desalination | Evaporation induced electricity generation | Performances                                           |                      |                      |                                     |             | Reference |
|--------------------------------------|--------------------------|--------------------------------------------|--------------------------------------------------------|----------------------|----------------------|-------------------------------------|-------------|-----------|
|                                      |                          |                                            | Evaporation rate (kg m <sup>-2</sup> h <sup>-1</sup> ) | Electricity output   |                      |                                     |             |           |
|                                      |                          |                                            |                                                        | V <sub>oc</sub> (mV) | I <sub>sc</sub> (μA) | Power density (mW m <sup>-2</sup> ) | Electrolyte |           |
| PCG membrane                         | R                        | R                                          | 2.07 (1 sun)                                           | 620                  | 41                   | 18.2                                | 600 mM NaCl | This work |
|                                      |                          |                                            | natural evaporation under dark condition               | 558                  | 32                   | 12.8                                | 600 mM NaCl |           |
| CNTs/paper                           | R                        | R                                          | 1.15 (1 sun)                                           | 600                  | 21                   | --                                  | 600 mM NaCl | S5        |
|                                      |                          |                                            | natural evaporation under dark condition               | 470                  | 7.5                  | --                                  | 600 mM NaCl |           |
| GO/mixed cellulose ester films       | R                        | R                                          | 1.3                                                    | 310                  | 5.3                  | --                                  | pure water  | S6        |
| Graphene/carbon cloth                | R                        | R                                          | 1.3                                                    | 100                  | --                   | --                                  | 600 mM NaCl | S7        |
|                                      |                          |                                            |                                                        | 370                  | --                   | --                                  | 500 mM NaCl |           |
| Wet textile                          | R                        | R                                          |                                                        | 200                  | 80                   | --                                  | 100 mM NaCl | S8        |
| AlOOH/UIO-66                         | R                        | R                                          |                                                        | 30                   | --                   | --                                  | 100 mM KCl  | S9        |
|                                      |                          |                                            |                                                        | 1200                 | 0.49                 | 0.15                                | pure water  |           |
| Porous carbon film                   | R                        | R                                          |                                                        | 40                   | --                   | --                                  | 100 mM NaCl | S10       |
|                                      |                          |                                            |                                                        | 1000                 | 1                    | 0.6                                 | pure water  |           |
| Carbon black                         | R                        | R                                          |                                                        | 60                   | --                   | --                                  | 100 mM NaCl | S11       |
|                                      |                          |                                            |                                                        | 1000                 | 0.15                 | 0.6                                 | pure water  |           |
| Glass-fiber-carbon-nanoparticle film | R                        | R                                          |                                                        | 5000                 | 1.5                  | 0.75                                | pure water  | S12       |

Table 1 continued

| Materials                                         | Solar vapor desalination | Evaporation induced electricity generation | Performances                                          |                    |                            |                                         |             | Reference |
|---------------------------------------------------|--------------------------|--------------------------------------------|-------------------------------------------------------|--------------------|----------------------------|-----------------------------------------|-------------|-----------|
|                                                   |                          |                                            | Evaporation rate ( $\text{kg m}^{-2} \text{h}^{-1}$ ) | Electricity output |                            |                                         | Electrolyte |           |
|                                                   |                          |                                            |                                                       | $V_{oc}$ (mV)      | $I_{sc}$ ( $\mu\text{A}$ ) | Power density ( $\mu\text{W cm}^{-2}$ ) |             |           |
| Ni–Al layered double hydroxide films              | ☑                        | ☑                                          |                                                       | 600                | 0.3                        | 0.075                                   | pure water  | S13       |
| Wood                                              | ☑                        | ☑                                          |                                                       | 300                | 10                         | 0.3                                     | pure water  | S14       |
| Al <sub>2</sub> O <sub>3</sub> nanoparticles film | ☑                        | ☑                                          |                                                       | 2500               | 0.8                        | 0.07                                    | pure water  | S15       |
| rGO sponges                                       | ☑                        | ☑                                          |                                                       | 630                | 110                        | 17.4                                    | pure water  | S16       |
| Carbon nanosphere@TiO <sub>2</sub> nanowires      | ☑                        | ☑                                          |                                                       | 1600               | 0.14                       | 0.2                                     | pure water  | S17       |
| GO/SA/CNT aerogels                                | ☑                        | ☑                                          | 1.622                                                 |                    |                            |                                         |             | S18       |
| PVA/Ppy gels                                      | ☑                        | ☑                                          | 3.2                                                   |                    |                            |                                         |             | S19       |
| PVA/rGO hydrogel                                  | ☑                        | ☑                                          | 2.5                                                   |                    |                            |                                         |             | S20       |
| Carbonized mushroom                               | ☑                        | ☑                                          | 1.475                                                 |                    |                            |                                         |             | S21       |
| MXene Ti <sub>3</sub> C <sub>2</sub>              | ☑                        | ☑                                          | 1.33                                                  |                    |                            |                                         |             | S22       |
| Vertically aligned graphene sheets membrane       | ☑                        | ☑                                          | 1.62                                                  |                    |                            |                                         |             | S23       |
| MOF-based hierarchical structure                  | ☑                        | ☑                                          | 1.5                                                   |                    |                            |                                         |             | S24       |
| PPy-based cone                                    | ☑                        | ☑                                          | 1.7                                                   |                    |                            |                                         |             | S25       |
| ALD/Chinese ink with wood                         | ☑                        | ☑                                          | 1.31                                                  |                    |                            |                                         |             | S26       |
| Paper-based rGO                                   | ☑                        | ☑                                          | 1.778                                                 |                    |                            |                                         |             | S27       |



Note: '--' represents no mention in the references. Meanwhile, due to the lack of key parameters such as area, current, thickness, etc., we cannot calculate the corresponding area power density

## References

- [S1] F. Zhao, X. Zhou, Y. Shi, X. Qian, M. Alexander, X. Zhao, S. Mendez, R. Yang, L. Qu and G. Yu, *Nat. Nanotechnol.* **2018**, 13, 489-495.
- [S1] J. Wang, Y. Li, L. Deng, N. Wei, Y. Weng, S. Dong, D. Qi, J. Qiu, X. Chen and T. Wu, *Adv. Mater.* **2017**, 29, 1603730.
- [S3] X. Ma, Z. Deng, Z. Li, D. Chen, X. Wan, X. Wang and X. Peng, *J. Mater. Chem. A* **2020**, 8, 22728-22735.
- [S4] L. Zhu, L. Sun, H. Zhang, D. F. Yu, H. Aslan, J. G. Zhao, Z. L. Li, M. Yu, F. Besenbacher and Y. Sun, *Nano Energy* **2019**, 57, 842-850.
- [S5] P. Xiao, J. He, F. Ni, C. Zhang, Y. Liang, W. Zhou, J. Gu, J. Xia, S.-W. Kuo, T. Chen, *Nano Energy* **2020**, 68, 104385.
- [S6] B. Hou, D. Kong, Z. Chen, Z. Shi, H. Cheng, D. D. Guo, X. Wang, *Appl. Therm. Eng.* **2019**, 163, 114322.
- [S7] B. Hou, D. Kong, J. Qian, Y. Yu, Z. Cui, X. Liu, J. Wang, T. Mei, J. Li, X. Wang, *Carbon* **2018**, 140, 488.
- [S8] S. S. Das, V. M. Pedireddi, A. Bandopadhyay, P. Saha, S. Chakraborty, *Nano Lett.* **2019**, 19, 7191.
- [S9] Q. Ma, Q. He, P. Yin, H. Cheng, X. Cui, Q. Yun, H. Zhang, *Adv. Mater.* **2020**, DOI: 10.1002/adma.202003720e2003720.
- [S10] T. Ding, K. Liu, J. Li, G. Xue, Q. Chen, L. Huang, B. Hu, J. Zhou, *Adv. Funct. Mater.* **2017**, 27, 22.
- [S11] G. Xue, Y. Xu, T. Ding, J. Li, J. Yin, W. Fei, Y. Cao, J. Yu, L. Yuan, L. Gong, J. Chen, S. Deng, J. Zhou, W. Guo, *Nat. Nanotechnol.* **2017**, 12, 317.
- [S12] J. Li, K. Liu, T. Ding, P. Yang, J. Duan, J. Zhou, *Nano Energy* **2019**, 58, 797.
- [S13] J. Tian, Y. Zang, J. Sun, J. Qu, F. Gao, G. Liang, *Nano Energy* **2020**, 70, 104502.
- [S14] X. Zhou, W. Zhang, C. Zhang, Y. Tan, J. Guo, Z. Sun, X. Deng, *ACS Appl. Mater. Interfaces* **2020**, 12, 11232.
- [S15] C. Shao, B. Ji, T. Xu, J. Gao, X. Gao, Y. Xiao, Y. Zhao, N. Chen, L. Jiang, L. Qu, *ACS Appl. Mater. Interfaces* **2019**, 11, 30927.
- [S16] G. Zhang, Z. Duan, X. Qi, Y. Xu, L. Li, W. Ma, H. Zhang, C. Liu, W. Yao, *Carbon* **2019**, 148, 1.
- [S17] B. Ji, N. Chen, C. Shao, Q. Liu, J. Gao, T. Xu, H. Cheng, L. Qu, *J. Mater. Chem. A* **2019**, 7, 6766.
- [S18] X. Hu, W. Xu, L. Zhou, Y. Tan, Y. Wang, S. Zhu, J. Zhu, *Adv. Mater.* **2017**, 29, 1604031.
- [S19] F. Zhao, X. Zhou, Y. Shi, X. Qian, M. Alexander, X. Zhao, S. Mendez, R. Yang, L. Qu, G. Yu, *Nat. Nanotech.* **2018**, 13, 489.
- [S20] F. Zhao, X. Zhou, Y. Shi, X. Qian, M. Alexander, X. Zhao, S. Mendez, R. Yang, L. Qu, G. Yu, *Nat. Nanotechnol.* **2018**, 13, 489.
- [S21] N. Xu, X. Hu, W. Xu, X. Li, L. Zhou, S. Zhu, J. Zhu, *Adv. Mater.* **2017**, 29, 1606762.
- [S22] R. Li, L. Zhang, L. Shi, P. Wang, *ACS Nano* **2017**, 11, 3752.

- [S23] P. Zhang, J. Li, L. Lv, Y. Zhao, L. Qu, *ACS Nano* **2017**, 11, 5087.
- [S24] Q. Ma, P. Yin, M. Zhao, Z. Luo, Y. Huang, Q. He, Y. Yu, Z. Liu, Z. Hu, B. Chen, H. Zhang, *Adv. Mater.* **2019**, 31, 17.
- [S25] Y. Wang, C. Wang, X. Song, M. Huang, S. K. Megarajan, S. F. Shaukat, H. Jiang, *J. Mater. Chem. A* **2018**, 6, 9874.
- [S26] H. C. Yang, Z. Chen, Y. Xie, J. Wang, J. W. Elam, W. Li, S. B. Darling, *Adv. Mater. Interfaces* **2018**, 6, 1.
- [S27] Z. Wang, Q. Ye, X. Liang, J. Xu, C. Chang, C. Song, W. Shang, J. Wu, P. Tao, T. Deng, *J. Mater. Chem. A* **2017**, 5, 16359.
